# Supplementary material
Source: PubMed Central journal article supplement (PMC3199371)
Supplement: NIHMS313866-supplement-01.pdf [file NIHMS313866-supplement-01.pdf]

Supplementary Table S1; Weiner et al, AJKD, "Cardiovascular Disease and Cognitive Function in Maintenance Hemodialysis Patients"

Table S1. Characteristics of the study populations

|                                      | Eligible but Not Consented | Total Consented  | Included in Primary Analyses | Excluded from Primary Analyses |                      |
|--------------------------------------|----------------------------|------------------|------------------------------|--------------------------------|----------------------|
|                                      | N=140                      | N=280            | N=200                        | Stroke N=48                    | Partial Testing N=32 |
| Age (years)                          | 64.8 ± 14.2                | 63.7 ± 16.8      | 61.5 ± 17.7                  | 68.2 ± 12.9                    | 68.2 ± 13.6          |
| Female (%)                           | 43.2                       | 47.1             | 47.0                         | 47.9                           | 46.9                 |
| African American (%)                 | 18.6                       | 21.4             | 23.5                         | 18.8                           | 12.5                 |
| Education (%)                        |                            |                  |                              |                                |                      |
| <12 <sup>th</sup> grade              | NR                         | 9.8              | 9.0                          | 10.4                           | 14.8                 |
| High school graduate                 | NR                         | 58.2             | 59.5                         | 58.3                           | 48.2                 |
| 2+ Years college                     | NR                         | 32.0             | 31.5                         | 31.3                           | 37.0                 |
| Medical History (%)                  |                            |                  |                              |                                |                      |
| Peripheral Vascular Disease          | 18.6                       | 22.1             | 20.5                         | 27.1                           | 25.0                 |
| Coronary Artery Disease              | 38.2                       | 33.9             | 31.0                         | 50.0                           | 28.1                 |
| Hypertension                         | 83.9                       | 87.5             | 88.0                         | 85.4                           | 87.5                 |
| Stroke                               | 13.7                       | 19.3             | ---                          | 100                            | 18.8                 |
| Diabetes                             | 46.0                       | 47.9             | 46.5                         | 52.1                           | 50.0                 |
| Heart Failure                        | 32.3                       | 33.6             | 32.0                         | 41.7                           | 31.3                 |
| Primary cause of ESRD (%)            |                            |                  |                              |                                |                      |
| Diabetes                             | 32.5                       | 37.2             | 35.5                         | 37.5                           | 46.9                 |
| Glomerulonephritis                   | 18.8                       | 18.4             | 19.5                         | 10.4                           | 28.1                 |
| Hypertension                         | 20.5                       | 19.1             | 18.0                         | 25.0                           | 15.6                 |
| Other                                | 21.4                       | 18.4             | 20.5                         | 16.7                           | 6.3                  |
| Unknown                              | 6.8                        | 6.9              | 6.5                          | 10.4                           | 3.1                  |
| Smoking History (%)                  |                            |                  |                              |                                |                      |
| Never                                | NR                         | 38.0             | 40.5                         | 29.8                           | 34.6                 |
| Past                                 | NR                         | 54.4             | 52.1                         | 57.5                           | 65.4                 |
| Current                              | NR                         | 7.6              | 7.4                          | 12.8                           | 0                    |
| Vascular Access (%)                  |                            |                  |                              |                                |                      |
| Fistula                              | NR                         | 63.5             | 60.0                         | 62.5                           | 82.8                 |
| Graft                                | NR                         | 4.4              | 5.5                          | 6.3                            | 0                    |
| Catheter                             | NR                         | 32.1             | 34.5                         | 31.3                           | 17.2                 |
| Systolic BP (mm Hg)                  | NR                         | 143.4 ± 20.5     | 143.4 ± 20.5                 | 141.4 ± 20.1                   | 142.5 ± 21.8         |
| Diastolic BP (mm Hg)                 | NR                         | 73.4 ± 12.3      | 74.4 ± 12.3                  | 72.3 ± 11.9                    | 67.3 ± 10.6          |
| Body Mass Index (kg/m <sup>2</sup> ) | NR                         | 28.4 ± 7.1       | 28.0 ± 6.6                   | 27.7 ± 5.6                     | 34.6 ± 10.5          |
| Hematocrit (%)                       | 36.2 ± 3.7                 | 35.7 ± 3.4       | 35.8 ± 3.3                   | 35.9 ± 3.6                     | 35.1 ± 3.1           |
| Serum Albumin (g/dL)                 | 3.7 ± 0.5                  | 3.8 ± 0.3        | 3.8 ± 0.4                    | 3.9 ± 0.3                      | 3.8 ± 0.3            |
| Phosphorus (mg/dL)                   | 5.1 ± 1.5                  | 5.4 ± 1.5        | 5.4 ± 1.5                    | 5.5 ± 1.7                      | 5.5 ± 1.5            |
| Dialysis Vintage (months)            | 15.3 (6.6, 42.1)           | 13.5 (6.3, 32.3) | 13.5 (6.4, 33.3)             | 12.8 (6.4, 37.6)               | 16.7 (3.2, 25.2)     |
| PTH (pg/ml)                          | 234 ± 168                  | 290 ± 248        | 285 ± 218                    | 326 ± 378                      | 272 ± 173            |
| spKt/V                               | 1.50 ± 0.27                | 1.52 ± 0.27      | 1.54 ± 0.27                  | 1.50 ± 0.28                    | 1.50 ± 0.26          |

Continuous data are mean ± standard deviation except vintage which is median (25<sup>th</sup> percentile, 75<sup>th</sup> percentile). CVD, cardiovascular disease; ESRD, End-Stage Renal Disease; BP, blood pressure; PTH, parathyroid hormone. To convert albumin to g/L, multiply by 10; to convert phosphorus to mmol/L multiply by 0.3229; and to convert PTH to ng/L multiply by 1. NR indicates data not collected for eligible individuals who did not consent.
