# Supplementary material
Source: PubMed Central journal article supplement (PMC3199371)
Supplement: NIHMS313866-supplement-02.pdf [file NIHMS313866-supplement-02.pdf]

Supplementary Table S2; Weiner et al, AJKD, "Cardiovascular Disease and Cognitive Function in Maintenance Hemodialysis Patients"

Table S2. Test scores stratified by CVD status and the results of linear regression analyses showing the relationship of CVD status with cognitive testing results, including individuals with stroke and with partial testing.

| Cognitive Test/Component                | N   | Test Scores      |              | Univariate   |         | Parsimonious |         | Extended |         |     |
|-----------------------------------------|-----|------------------|--------------|--------------|---------|--------------|---------|----------|---------|-----|
|                                         |     | No CVD           | CVD          | Beta         | p-value | Beta         | p-value | Beta     | p-value |     |
| Executive Score*                        | 248 | 0.28 ± 0.99      | -0.40 ± 0.89 | -0.67        | <0.001  | -0.35        | 0.003   | -0.32    | 0.008   |     |
| Memory Score**                          | 248 | 0.11 ± 1.00      | -0.15 ± 0.98 | -0.26        | 0.05    | 0.07         | 0.6     | 0.09     | 0.5     |     |
| Mini-Mental State Exam <sup>a</sup>     | 273 | 26.7 ± 2.9       | 26.5 ± 2.9   | -0.2         | 0.6     | 0.5          | 0.2     | 0.5      | 0.2     |     |
| Immediate Recall (Total) <sup>b</sup>   | 270 | 25.0 ± 7.5       | 22.6 ± 7.4   | -2.4         | 0.009   | 1.2          | 0.1     | 1.0      | 0.3     |     |
| Immediate Recall (Trial 1) <sup>c</sup> | 270 | 3.9 ± 1.6        | 3.6 ± 1.7    | -0.23        | 0.3     | 0.4          | 0.07    | 0.4      | 0.05    |     |
| Short Delayed Recall <sup>d</sup>       | 270 | 5.2 ± 3.0        | 4.2 ± 3.0    | -1.0         | 0.009   | 0.2          | 0.6     | 0.3      | 0.5     |     |
| Delayed Recall <sup>e</sup>             | 269 | 4.6 ± 2.9        | 3.9 ± 2.7    | -0.8         | 0.03    | 0.3          | 0.4     | 0.4      | 0.2     |     |
| Recognition <sup>f</sup>                | 269 | 21.2 ± 2.8       | 20.1 ± 3.3   | -1.0         | 0.005   | -0.3         | 0.5     | -0.3     | 0.5     |     |
| Block Design <sup>g</sup>               | 266 | 28.7 ± 10.8      | 22.7 ± 9.3   | -6.0         | <0.001  | -3.3         | 0.007   | -3.3     | 0.009   |     |
| Digit Symbol Coding*                    | 250 | 45.0 ± 18.4      | 32.7 ± 12.3  | -12.3        | <0.001  | -4.2         | 0.02    | -2.8     | 0.1     |     |
| Trails A <sup>h</sup>                   | 254 | 53.5 ± 34.3      | 70.4 ± 39.6  | 16.9         | <0.01   | 6.0          | 0.2     | 4.7      | 0.3     |     |
| Trails B <sup>i</sup>                   | 254 | Completion       | 123.4 ± 63.1 | 164.0 ± 61.9 | 57.0    | <0.001       | 17.6    | 0.2      | 15.9    | 0.2 |
|                                         |     | % Non-Completion | 17.3         | 27.9         |         |              |         |          |         |     |

Results are mean ± standard deviation. Individual test results represent number or percent correct except Trails A and B which are reported in seconds required to complete the task. Component scores by definition have a mean of 0 and standard deviation of 1 for the population. Negative coefficients indicate that CVD is associated with poorer performance on all tests except Trails A and B. Parsimonious models adjust for age, education, sex and race, while extended models additionally adjust for \*cause of ESRD and BMI; \*\*diabetes, BMI, diastolic blood pressure, Kt/V, phosphorus and vascular access; <sup>a</sup>cause of ESRD, BMI, Kt/V, and phosphorus; <sup>b</sup>diabetes, BMI, diastolic blood pressure, and Kt/V; <sup>c</sup>BMI, systolic blood pressure, PTH and Kt/V; <sup>d</sup>BMI, systolic blood pressure, Kt/V, and phosphorus; <sup>e</sup>BMI, diastolic blood pressure, Kt/V, phosphorus and vascular access; <sup>f</sup>diabetes, BMI, diastolic blood pressure, Kt/V, and vascular access; <sup>g</sup>BMI; <sup>h</sup>vintage and Kt/V; and <sup>i</sup>Cause of ESRD, BMI and Kt/V. Testing was performed in the following order: 1) Mini-Mental State Exam; 2) North American Adult Reading Test (not analyzed); 3) Word List A; 4) Word List B; 5) Word List A Short Delayed Recall; 6) Digit Symbol Coding; 7) Trails A; 8) Trails B; 9) Block Design; 10) Word List A Delayed Recall; 11) Word List A Recognition.
